# Supplementary material for: DeORFanizing Candida albicans Genes using Coexpression
Source: PubMed Central journal article supplement (PMC7845621; doi:10.1128/msphere.01245-20), 2021-01-20

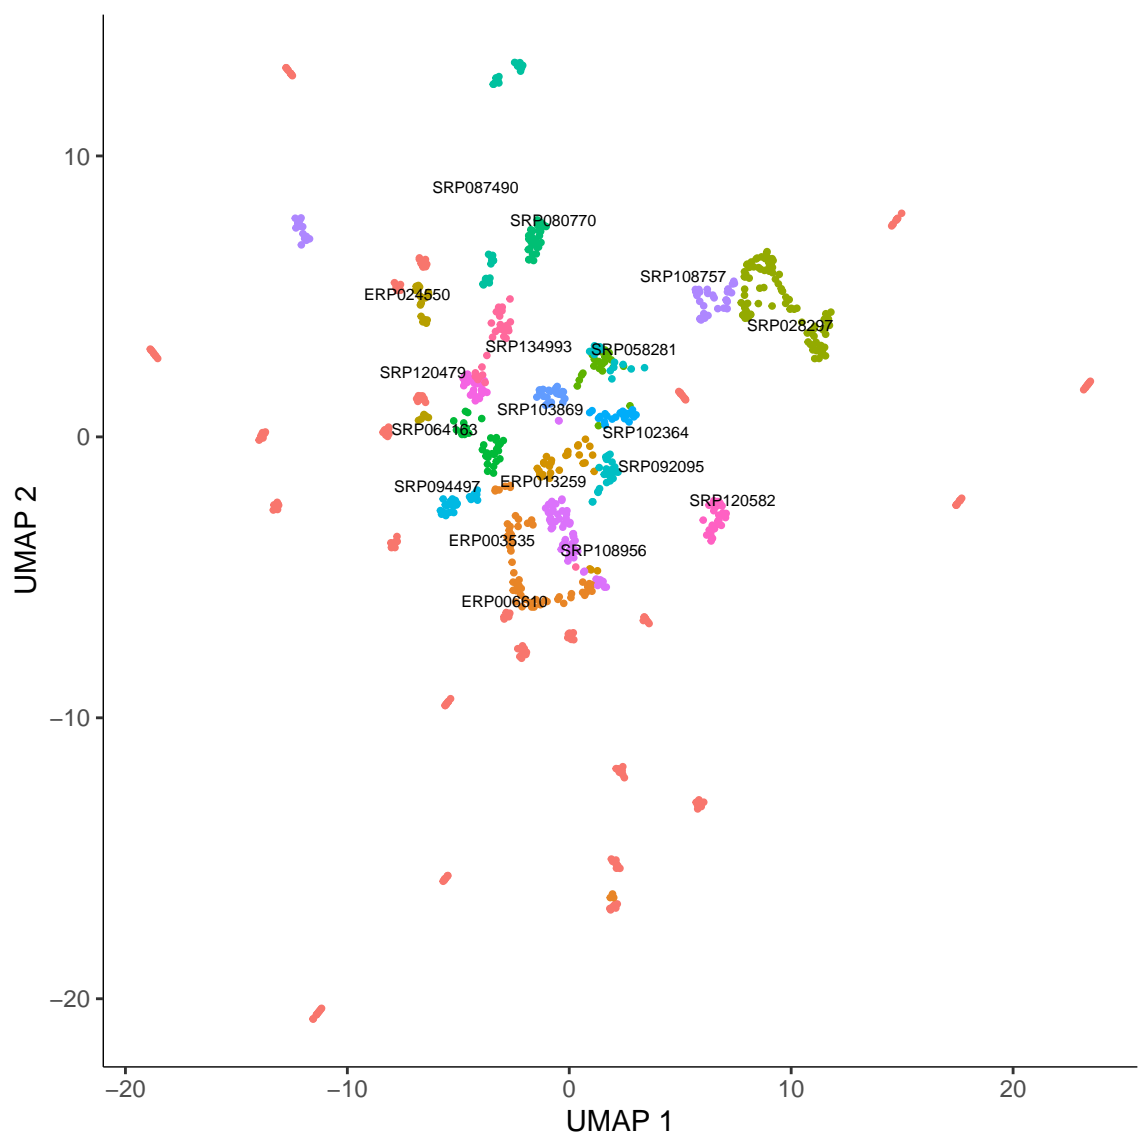

Supplement: mSphere.01245-20-sf003.pdf [file mSphere.01245-20-sf003.pdf]
